# Supplementary material for: Signatures of TOP1 transcription-associated mutagenesis in cancer and germline
Source: Springer Nature journal article supplement (doi:10.1038/s41586-022-04403-y), 2022-02-09
Supplement: MOESM1 [file 41586_2022_4403_MOESM1_ESM.pdf]

---

**Supplementary information**

---

**Signatures of TOP1 transcription-associated mutagenesis in cancer and germline**

---

In the format provided by the authors and unedited

# Supplementary Information to:

## Signatures of TOP1 transcription-associated mutagenesis in cancer and germline

Martin A.M. Reijns<sup>1,14\*</sup>, David A. Parry<sup>1,14</sup>, Thomas C. Williams<sup>1,2,14</sup>, Ferran Nadeu<sup>3,4</sup>, Rebecca L. Hindshaw<sup>5</sup>, Diana O. Rios Szwed<sup>1</sup>, Michael D. Nicholson<sup>6</sup>, Paula Carroll<sup>1</sup>, Shelagh Boyle<sup>7</sup>, Romina Royo<sup>8</sup>, Alex J. Cornish<sup>9</sup>, Hang Xiang<sup>10</sup>, Kate Ridout<sup>11</sup>, The Genomics England Research Consortium<sup>+</sup>, Colorectal Cancer Domain UK 100,000 Genomes Project<sup>+</sup>, Anna Schuh<sup>11</sup>, Konrad Aden<sup>10</sup>, Claire Palles<sup>5</sup>, Elias Campo<sup>3,4,12,13</sup>, Tatjana Stankovic<sup>5</sup>, Martin S. Taylor<sup>2\*</sup>, Andrew P. Jackson<sup>1\*</sup>

<sup>1</sup> Disease Mechanisms, MRC Human Genetics Unit, Institute of Genetics and Cancer, The University of Edinburgh, Edinburgh, UK

<sup>2</sup> Biomedical Genomics, MRC Human Genetics Unit, Institute of Genetics and Cancer, The University of Edinburgh, Edinburgh, UK

<sup>3</sup> Institut d'Investigacions Biomèdiques August Pi i Sunyer (IDIBAPS), Barcelona, Spain

<sup>4</sup> Centro de Investigación Biomédica en Red de Cáncer (CIBERONC), Madrid, Spain

<sup>5</sup> Institute of Cancer and Genomic Sciences, University of Birmingham, Edgbaston, UK

<sup>6</sup> Cancer Research UK Edinburgh Centre, Institute of Genetics and Cancer, The University of Edinburgh, Edinburgh, UK

<sup>7</sup> Genome Regulation, MRC Human Genetics Unit, Institute of Genetics and Cancer, The University of Edinburgh, Edinburgh, UK

<sup>8</sup> Barcelona Supercomputing Center (BSC), Barcelona, Spain

<sup>9</sup> The Institute of Cancer Research, London, UK

<sup>10</sup> Institute of Clinical Molecular Biology, Christian-Albrechts-University and University Hospital Schleswig-Holstein, Kiel, Germany

<sup>11</sup> Department of Oncology, University of Oxford, Oxford, UK

<sup>12</sup> Hospital Clínic of Barcelona, Barcelona, Spain

<sup>13</sup> Departament de Fonaments Clínics, Universitat de Barcelona, Barcelona, Spain

<sup>14</sup> These authors contributed equally: Martin A.M. Reijns, David A. Parry, Thomas C. Williams

<sup>+</sup> A list of authors and their affiliations appears at the end of the paper.

\* Correspondence to MAMR, MST, APJ

## Table of Contents

|                                                                         |          |
|-------------------------------------------------------------------------|----------|
| Supplementary Fig. 1   Gel source data                                  | page 3   |
| Supplementary Table 1   Plasmids used in this study                     | page 4   |
| Supplementary Table 2   <i>S. cerevisiae</i> strains used in this study | page 4   |
| Supplementary Table 3   Oligonucleotides used in this study             | page 5   |
| Supplementary Table 4   Human cell lines used in this study             | page 6   |
| Supplementary Table 5   Published datasets used in this study           | page 7,8 |
| Supplementary References                                                | page 8,9 |

**Fig. 2b**

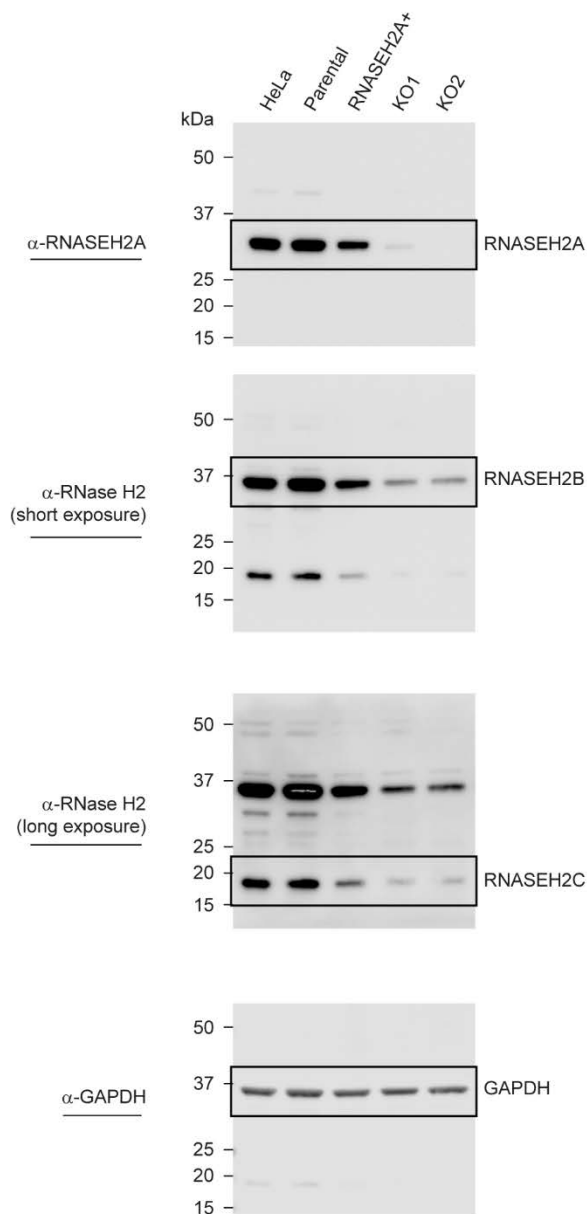

**Extended Data Fig. 4a**

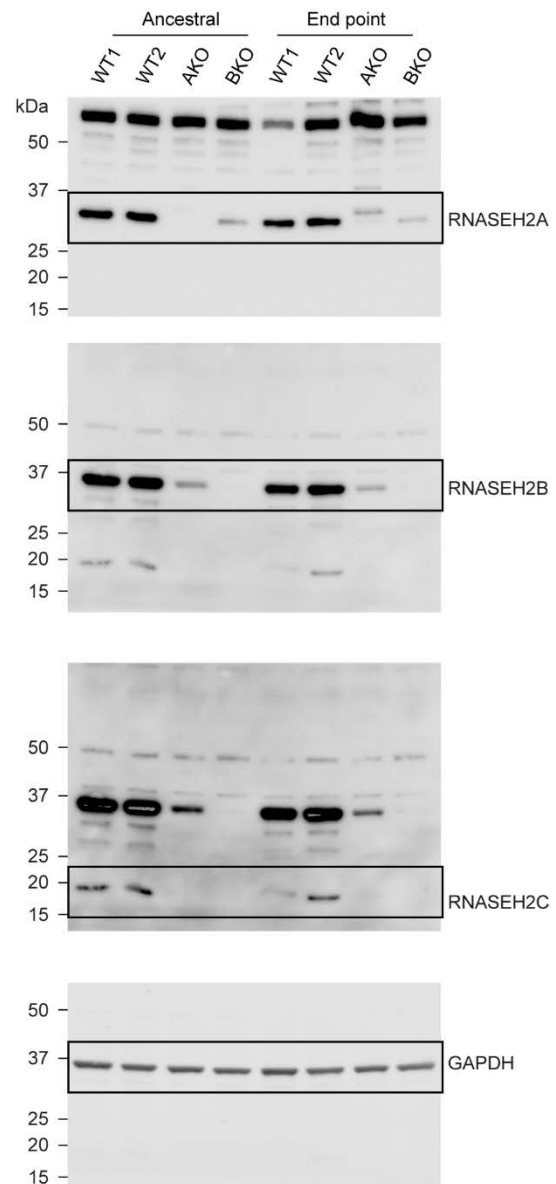

**Supplementary Fig. 1 | Gel source data.** For Fig. 2b and Extended Data Fig. 4a, samples were run on the same gel as the GAPDH loading control. Uncropped, full gel images are displayed in Extended Data Fig. 3a,b,f and Extended Data Fig. 4c, and contain labeled molecular weight markers; these are therefore not reproduced here.

**Supplementary Table 1 | Plasmids<sup>a</sup> used in this study**

| Plasmid                        | Description                                                                                                                                                       | Reference                                                         |
|--------------------------------|-------------------------------------------------------------------------------------------------------------------------------------------------------------------|-------------------------------------------------------------------|
| pFA6a-natMX6                   | For PCR-mediated gene disruption with nourseothricin resistance cassette                                                                                          | <sup>1</sup> , a gift from Aziz El Hage                           |
| pFA6a-His3MX6                  | For PCR-mediated gene disruption with HIS3 nutritional selection cassette                                                                                         | <sup>2</sup> , a gift from Jean Beggs                             |
| pTCW12                         | <i>S. cerevisiae</i> 2-bp deletion reporter, with SSTR-enriched HygroR (allows PCR-based amplification using MX6 primers for genomic integration)                 | This work (Fig. 1)                                                |
| pTCW14                         | Gateway compatible Entry vector containing mammalian 2-bp deletion reporter, with SSTR-enriched HygroR                                                            | This work (Fig. 2)                                                |
| pXAT2                          | Cas9 and AAVS1 sgRNA expression vector                                                                                                                            | <sup>3</sup> , a gift from Knut Woltjen (Addgene plasmid # 80494) |
| pAAVS-Nst-CAG-Dest             | Gateway Destination donor vector for AAVS1 targeting                                                                                                              | <sup>3</sup> , a gift from Knut Woltjen (Addgene plasmid # 80489) |
| pTCW15                         | Mammalian 2-bp deletion reporter from pTCW14 recombined into pAAVS-Nst-CAG-Dest (allows integration at the human AAVS1 locus when used in combination with pXAT2) | This work (Fig. 2, Extended Data Fig. 2 and 3)                    |
| pK18                           | A KanR plasmid, used for cloning and generating fluorescent in situ hybridisation (FISH) probes                                                                   | <sup>4</sup> , a gift from Laura Lettice                          |
| pTCW16                         | Human reporter construct (pTCW14/15) without the AAVS1 homology arms ( <i>HindIII/Scal</i> ) cloned in pK18. Used for FISH probe synthesis                        | This work (Extended Data Fig. 3)                                  |
| pX461                          | Contains Cas9n (D10A nickase mutant) from <i>S. pyogenes</i> with 2A-EGFP, and cloning backbone for sgRNA                                                         | <sup>5</sup> , a gift from Feng Zhang (Addgene plasmid # 48140)   |
| pX462                          | Contains Cas9n (D10A nickase mutant) from <i>S. pyogenes</i> with 2A-Puro, and cloning backbone for sgRNA                                                         | <sup>5</sup> , a gift from Feng Zhang (Addgene plasmid # 48141)   |
| pX461-RNASEH2A-gRNA1 (pMAR526) | Expresses guide RNA targeting exon 1 of human RNASEH2A                                                                                                            | <sup>6,7</sup>                                                    |
| pX462-RNASEH2A-gRNA2 (pMAR527) | Expresses guide RNA targeting just downstream of human RNASEH2A exon 1                                                                                            | <sup>6,7</sup>                                                    |

<sup>a</sup> Plasmids generated for this work available on request

**Supplementary Table 2 | *S. cerevisiae* strains<sup>a</sup> used in this study**

| Name   | Relevant features                                       | Genotype                                                                       |
|--------|---------------------------------------------------------|--------------------------------------------------------------------------------|
| BY4741 | Parental strain                                         | MATa his3Δ1 leu2Δ0 met15Δ ura3Δ0                                               |
| TCWY16 | Wild type strain with 2-bp deletion reporter            | BY4741, agp1::HpH-2bp-del-reporter(from pTCW12)                                |
| TCWY18 | <i>top1Δ</i> strain with 2-bp deletion reporter         | BY4741, top1Δ::natMX6 agp1::HpH-2bp-del-reporter(from pTCW12)                  |
| TCWY19 | <i>rnh201Δ top1Δ</i> strain with 2-bp deletion reporter | BY4741, rnh201Δ::natMX6 top1Δ::His3MX6 agp1::HpH-2bp-del-reporter(from pTCW12) |
| TCWY20 | <i>rnh201Δ</i> strain with 2-bp deletion reporter       | BY4741 rnh201Δ::natMX6 agp1::HpH-2bp-del-reporter(from pTCW12)                 |

<sup>a</sup> Yeast strains generated for this work available on request

**Supplementary Table 3 | Oligonucleotides used in this study**

| Name          | Sequence                                                                                 | Used for                                                                                             |
|---------------|------------------------------------------------------------------------------------------|------------------------------------------------------------------------------------------------------|
| AGP1-MX6-F    | TGGGTATTGGTCGGTAACGGTACCGC<br>GTTGGTTCATGCGGGTCCAGCTGGACT<br>ACTTATCGGATCCCCGGGTTAATTAAG | Amplification of 2-bp deletion reporter construct from pTCW12 for insertion at the <i>AGP1</i> locus |
| AGP1-MX6-R    | CTTCTTGCTTGATTAATTCATCAAA<br>GATTTGTCTATGAGAATCTAGGTGCGAT<br>CTTGTGAATTCGAGCTCGTTTAAAC   | Amplification of 2-bp deletion reporter construct from pTCW12 for insertion at the <i>AGP1</i> locus |
| S24F          | ACGGATCCCCGGGTTAAT                                                                       | Sequencing of yeast 2-bp deletion reporter                                                           |
| S297F         | CACAGACGCGTTGAATTGTC                                                                     | Sequencing of yeast 2-bp deletion reporter                                                           |
| S752F         | CAAGATCTCCAGAGACAGAGC                                                                    | Sequencing of 2-bp deletion reporter                                                                 |
| S1258F        | TGGTCTCGACCAACTATACCAG                                                                   | Sequencing of 2-bp deletion reporter                                                                 |
| S1793F        | AAAGGTAGCGTTGCCAATGA                                                                     | Sequencing of yeast 2-bp deletion reporter                                                           |
| S2298F        | ACCAGGATCTTGCCATCCTA                                                                     | Sequencing of yeast 2-bp deletion reporter                                                           |
| S142R         | GCACGTCAAGACTGTCAAGG                                                                     | Sequencing of yeast 2-bp deletion reporter                                                           |
| S588R         | CATATCTCTCCCTCCACA                                                                       | Sequencing of 2-bp deletion reporter                                                                 |
| S1113R        | ACATCGCCTCTGACCACTCT                                                                     | Sequencing of 2-bp deletion reporter                                                                 |
| S1658R        | GCCTCGAAACGTGAGTCTTT                                                                     | Sequencing of yeast 2-bp deletion reporter                                                           |
| S2136R        | CCATTACGCTCGTCATCAAA                                                                     | Sequencing of yeast 2-bp deletion reporter                                                           |
| S2652R        | CGACAGCAGTATAGCGACCA                                                                     | Sequencing of yeast 2-bp deletion reporter                                                           |
| dna803        | TCGACTTCCCTCTCCGATG                                                                      | Extended Data Fig. 3                                                                                 |
| dna804        | GAGCCTAGGGCCGGGATTCTC                                                                    | Extended Data Fig. 3                                                                                 |
| dna183        | CTCAGTTTCTGGGAGAGGGTAG                                                                   | Extended Data Fig. 3                                                                                 |
| Puro-F        | GTCACCGAGCTGCAAGAATC                                                                     | Extended Data Fig. 3                                                                                 |
| Puro-3F       | GCGCACCTGGTGCATGACC                                                                      | Extended Data Fig. 3                                                                                 |
| HA-doR        | GAGTTTGCCAAGCAGTCACC                                                                     | Extended Data Fig. 3                                                                                 |
| HygroR_up     | CAACGTGCTGGTTATTGTGC                                                                     | Amplification and sequencing of human 2-bp deletion reporter                                         |
| PuroR_rev     | CAGCTGCACCTGAGGAGTG                                                                      | Amplification and sequencing of human 2-bp deletion reporter                                         |
| H1443F        | GTCACCGAGCTGCAAGAATC                                                                     | Sequencing of human 2-bp deletion reporter                                                           |
| H1755F        | GTCGAGGTGCCCGAAGGAC                                                                      | Sequencing of human 2-bp deletion reporter                                                           |
| H1327R        | GTGGGCTTGTACTCGGTCAT                                                                     | Sequencing of human 2-bp deletion reporter                                                           |
| RNASEH2A-ex1F | ACCCGCTCCTGCAGTATTAG                                                                     | Amplification and sequencing across <i>RNASEH2A</i> exon 1 to check for CRISPR/Cas9 genome editing   |
| RNASEH2A-ex1R | TCCCTTGGTGCAGTGAATC                                                                      | Amplification and sequencing across <i>RNASEH2A</i> exon 1 to check for CRISPR/Cas9 genome editing   |

**Supplementary Table 4 | Human cell lines<sup>a</sup> used in this study**

| Relevant features                 | Description                                                                                                                                                                                                                                                                                           | Reference                              |
|-----------------------------------|-------------------------------------------------------------------------------------------------------------------------------------------------------------------------------------------------------------------------------------------------------------------------------------------------------|----------------------------------------|
| HeLa parental reporter cells      | HeLa cell clone with mammalian 2-bp deletion reporter (from pTCW15) integrated at a single AAVS1 allele                                                                                                                                                                                               | This work                              |
| HeLa RNASEH2A-KO reporter clone 1 | RNase H2 null clone. HeLa reporter cells with CRISPR/Cas9-mediated <i>RNASEH2A</i> knockout. Three loss of function mutations in exon 1 identified by capillary sequencing: 46 bp deletion, 39 bp deletion (deleting splice donor site), in-frame 21 bp deletion covering catalytic site residue D34) | This work                              |
| HeLa RNASEH2A-KO reporter clone 2 | RNase H2 null clone. HeLa reporter cells with CRISPR/Cas9-mediated <i>RNASEH2A</i> knockout confirmed by capillary sequencing. Mutations in exon 1: 38 bp deletion, 14 bp deletion + 92 bp insertion.                                                                                                 | This work                              |
| HeLa RNASEH2A+ reporter clone     | RNase H2 proficient clone, resulting from CRISPR/Cas9 genome editing of HeLa parental reporter cells. Capillary sequencing detected in-frame 9 bp deletion in exon 1 not involving catalytic site residues + intronic 24 bp duplication mutation; 1 bp insertion + 11 bp deletion.                    | This work                              |
| HeLa RNASEH2A-KO control clone    | RNase H2 null clone. Previously published CRISPR/Cas9-mediated <i>RNASEH2A</i> knockout clone                                                                                                                                                                                                         | <sup>6,7</sup>                         |
| hTERT-RPE1 TP53-KO                | hTERT-RPE1 (ATCC) with CRISPR/Cas9-mediated <i>TP53</i> knockout                                                                                                                                                                                                                                      | <sup>7</sup> , a gift from D. Durocher |
| hTERT-RPE1 TP53-KO RNASEH2A-KO    | hTERT-RPE1 TP53-KO with CRISPR/Cas9-mediated <i>RNASEH2A</i> knockout (homozygous for 4 bp deletion in exon 3)                                                                                                                                                                                        | <sup>7</sup> , a gift from D. Durocher |
| hTERT-RPE1 TP53-KO RNASEH2B-KO    | hTERT-RPE1 TP53-KO with CRISPR/Cas9-mediated <i>RNASEH2B</i> knockout (homozygous for 1 bp insertion in exon 5)                                                                                                                                                                                       | <sup>7</sup> , a gift from D. Durocher |

<sup>a</sup> Cell lines generated for this work available on request

**Supplementary Table 5 | Published datasets used in this study**

| Description                                                                                                                                 | Origin                                                                                                                                                                                                                                                                                                                                                                                                                                                                                                                      | Reference |
|---------------------------------------------------------------------------------------------------------------------------------------------|-----------------------------------------------------------------------------------------------------------------------------------------------------------------------------------------------------------------------------------------------------------------------------------------------------------------------------------------------------------------------------------------------------------------------------------------------------------------------------------------------------------------------------|-----------|
| WGS for MLH-KO organoids (Extended Data Fig. 1)                                                                                             | VCF files shared by R. van Boxtel, University Medical Center Utrecht, The Netherlands                                                                                                                                                                                                                                                                                                                                                                                                                                       | 8         |
| Categorised indels for WGS of ovarian adenocarcinoma from ICGC/TCGA PCAWG consortium somatic mutation calls (Extended Data Fig. 1)          | <a href="https://dcc.icgc.org/releases/PCAWG/mutational_signatures/Input_Data_PCAWG7_23K_Spectra_DB/Mutation_Catalogs_-_Spectra_of_Individual_Tumours">https://dcc.icgc.org/releases/PCAWG/mutational_signatures/Input_Data_PCAWG7_23K_Spectra_DB/Mutation_Catalogs -- Spectra of Individual Tumours</a>                                                                                                                                                                                                                    | 9         |
| WGS for <i>S. cerevisiae rnh201Δ pol2-M644G</i> (Fig. 1, Extended Data Fig. 7)                                                              | <a href="https://www.ncbi.nlm.nih.gov/sra/?term=SRP062900">https://www.ncbi.nlm.nih.gov/sra/?term=SRP062900</a> (NCBI SRA database, study no. SRP062900)                                                                                                                                                                                                                                                                                                                                                                    | 10        |
| delta [(-2)]-7B-YUNI300 <i>S. cerevisiae</i> reference genome                                                                               | <a href="https://www.ncbi.nlm.nih.gov/geo/query/acc.cgi?acc=GSE56939">https://www.ncbi.nlm.nih.gov/geo/query/acc.cgi?acc=GSE56939</a> (NCBI GEO, accession number GSE56939)                                                                                                                                                                                                                                                                                                                                                 | 11        |
| WGS for CLL and irinotecan treated and untreated CRC (Genomics England 100,000 Genomes Project) <sup>a</sup> (Fig. 5, Extended Data Fig. 8) | Primary data from the 100,000 Genomes Project, which are held in a secure Research Environment, are available to registered users. For further information, see <a href="https://www.genomicsengland.co.uk/about-gecip/for-gecip-members/data-and-data-access/">https://www.genomicsengland.co.uk/about-gecip/for-gecip-members/data-and-data-access/</a>                                                                                                                                                                   | 12        |
| WGS for CLL (ICGC) (Fig. 5, Extended Data Fig. 8)                                                                                           | <a href="https://ega-archive.org/studies/EGAS00001001306">https://ega-archive.org/studies/EGAS00001001306</a> (European Genome-Phenome Archive, accession number EGAS00001001306)                                                                                                                                                                                                                                                                                                                                           | 13        |
| PCAWG indels (Fig. 5, Extended Data Fig. 8)                                                                                                 | <a href="https://dcc.icgc.org/api/v1/download?fn=/PCAWG/consensus_snv_indel/final_consensus_passonly.snv_mnv_in_del.icgc.public.maf.gz">https://dcc.icgc.org/api/v1/download?fn=/PCAWG/consensus_snv_indel/final_consensus_passonly.snv_mnv_in_del.icgc.public.maf.gz</a>                                                                                                                                                                                                                                                   | 14        |
| PCAWG RNA-seq mRNA baseline (Fig. 5, Extended Data Fig. 8)                                                                                  | ArrayExpress E-MTAB-5200<br><a href="https://www.ebi.ac.uk/gxa/experiments-content/E-MTAB-5200/resources/ExperimentDownloadSupplier.RnaSeqBaseline/tpms.tsv">https://www.ebi.ac.uk/gxa/experiments-content/E-MTAB-5200/resources/ExperimentDownloadSupplier.RnaSeqBaseline/tpms.tsv</a> ; downloaded on 27 <sup>th</sup> July 2021                                                                                                                                                                                          | 9         |
| Human de novo mutations from Gene4Denovo (Fig. 5, Extended Data Fig. 9)                                                                     | <a href="http://www.genemed.tech/gene4denovo/uploads/All_De_novo_mutations_1.2.txt">http://www.genemed.tech/gene4denovo/uploads/All_De_novo_mutations_1.2.txt</a>                                                                                                                                                                                                                                                                                                                                                           | 15        |
| Human germ cell transcriptome data (Fig. 5)                                                                                                 | <a href="https://www.ncbi.nlm.nih.gov/geo/query/acc.cgi?acc=GSE125372">https://www.ncbi.nlm.nih.gov/geo/query/acc.cgi?acc=GSE125372</a> (NCBI GEO database, accession code GSE125372)                                                                                                                                                                                                                                                                                                                                       | 16        |
| TOP1-seq (Fig. 5, Extended Data Fig. 8)                                                                                                     | <a href="https://www.ncbi.nlm.nih.gov/geo/query/acc.cgi?acc=GSE57628">https://www.ncbi.nlm.nih.gov/geo/query/acc.cgi?acc=GSE57628</a> (NCBI GEO database, accession code GSE57628; samples GSM1385717 and GSM1385718)                                                                                                                                                                                                                                                                                                       | 17        |
| emRiboSeq <i>rnh201Δ</i> yeast (Extended Data Fig. 7)                                                                                       | <a href="https://www.ncbi.nlm.nih.gov/geo/query/acc.cgi?acc=GSE64521">https://www.ncbi.nlm.nih.gov/geo/query/acc.cgi?acc=GSE64521</a> (Sequence Read Archive sample accession codes: SRX824147, SRX824139, SRX824136, SRX824134)                                                                                                                                                                                                                                                                                            | 18        |
| Human GRCh37 reference genome                                                                                                               | <a href="ftp://ftp-trace.ncbi.nih.gov/1000genomes/ftp/technical/reference/phase2_reference_assembly_sequence/hs37d5.fa.gz">ftp://ftp-trace.ncbi.nih.gov/1000genomes/ftp/technical/reference/phase2_reference_assembly_sequence/hs37d5.fa.gz</a>                                                                                                                                                                                                                                                                             |           |
| Human hg38 reference genome                                                                                                                 | <a href="ftp://hgdownload.cse.ucsc.edu/goldenPath/hg38/bigZips/hg38.fa.gz">ftp://hgdownload.cse.ucsc.edu/goldenPath/hg38/bigZips/hg38.fa.gz</a>                                                                                                                                                                                                                                                                                                                                                                             |           |
| Mouse GRCm38 reference genome                                                                                                               | <a href="ftp://ftp-mouse.sanger.ac.uk/ref/GRCm38_68.fa.gz">ftp://ftp-mouse.sanger.ac.uk/ref/GRCm38_68.fa.gz</a>                                                                                                                                                                                                                                                                                                                                                                                                             | 19        |
| Mouse Indel and Structural Variant Data                                                                                                     | <a href="ftp://ftp-mouse.sanger.ac.uk/REL-1505-SNPs_Indels/mgp.v5.merged.indels.dbSNP142.normed.vcf.gz">ftp://ftp-mouse.sanger.ac.uk/REL-1505-SNPs_Indels/mgp.v5.merged.indels.dbSNP142.normed.vcf.gz</a> and <a href="ftp://ftp-mouse.sanger.ac.uk/REL-1606-SV/mgpv5.SV_insertions.bed.gz">ftp://ftp-mouse.sanger.ac.uk/REL-1606-SV/mgpv5.SV_insertions.bed.gz</a> and <a href="ftp://ftp-mouse.sanger.ac.uk/REL-1606-SV/mgpv5.SV_deletions.bed.gz">ftp://ftp-mouse.sanger.ac.uk/REL-1606-SV/mgpv5.SV_deletions.bed.gz</a> | 19        |
| Human Short Polymorphism Data                                                                                                               | <a href="https://ftp.ncbi.nih.gov/snp/organisms/human_9606_b151_GRCh37p13/VCF/All_20180423.vcf.gz">https://ftp.ncbi.nih.gov/snp/organisms/human_9606_b151_GRCh37p13/VCF/All_20180423.vcf.gz</a>                                                                                                                                                                                                                                                                                                                             | 20        |
| Human Structural Variant Data                                                                                                               | <a href="https://hgdownload.soe.ucsc.edu/gbdb/hg38/bbi/dbVar">https://hgdownload.soe.ucsc.edu/gbdb/hg38/bbi/dbVar</a>                                                                                                                                                                                                                                                                                                                                                                                                       | 21        |
| Human gene annotations                                                                                                                      | Ensembl ( <a href="https://www.ensembl.org">https://www.ensembl.org</a> , <a href="ftp://ftp.ensembl.org/pub/release-90/gtf/homo_sapiens/Homo_sapiens.GRCh38.90.gtf.gz">ftp://ftp.ensembl.org/pub/release-90/gtf/homo_sapiens/Homo_sapiens.GRCh38.90.gtf.gz</a> )                                                                                                                                                                                                                                                           | 22,23     |



|                         |                                                                                                                                                                                                                                                                                                                                                                                                                                     |    |
|-------------------------|-------------------------------------------------------------------------------------------------------------------------------------------------------------------------------------------------------------------------------------------------------------------------------------------------------------------------------------------------------------------------------------------------------------------------------------|----|
|                         | and <a href="http://ftp.ensembl.org/pub/release-75/gtf/homo_sapiens/Homo_sapiens.GRCh37.75.gtf.gz">http://ftp.ensembl.org/pub/release-75/gtf/homo_sapiens/Homo_sapiens.GRCh37.75.gtf.gz</a> ) and GENCODE ( <a href="https://ftp.ebi.ac.uk/pub/databases/genCODE/GenCODE_human/release_38/genCODE.v38.annotation.gff3.gz">https://ftp.ebi.ac.uk/pub/databases/genCODE/GenCODE_human/release_38/genCODE.v38.annotation.gff3.gz</a> ) |    |
| Mouse gene annotations  | GENCODE ( <a href="https://ftp.ebi.ac.uk/pub/databases/genCODE/GenCODE_mouse/release_M25/genCODE.vM25.annotation.gff3.gz">https://ftp.ebi.ac.uk/pub/databases/genCODE/GenCODE_mouse/release_M25/genCODE.vM25.annotation.gff3.gz</a> )                                                                                                                                                                                               | 24 |
| Genome mappability data | <a href="https://bismap.hoffmanlab.org">https://bismap.hoffmanlab.org</a>                                                                                                                                                                                                                                                                                                                                                           | 25 |

<sup>a</sup> CLL and CRC data from the 100,000 Genomes Project are held in a secure Research Environment to protect participant privacy and can be accessed by joining an appropriate GECIP Domain using the application form at <https://www.genomicsengland.co.uk/join-a-gecip-domain/>. Detailed information on accessing 100,000 Genomes Project data including expected application timeframes and data use restrictions can be found at <https://research-help.genomicsengland.co.uk/display/OC/GeCIP+and+your+access+to+data>.

### Supplementary References

- Hentges, P., Van Driessche, B., Tafforeau, L., Vandenhoute, J. & Carr, A. M. Three novel antibiotic marker cassettes for gene disruption and marker switching in *Schizosaccharomyces pombe*. *Yeast* **22**, 1013-1019, doi:10.1002/yea.1291 (2005).
- Wach, A., Brachat, A., Alberti-Segui, C., Rebischung, C. & Philippsen, P. Heterologous HIS3 marker and GFP reporter modules for PCR-targeting in *Saccharomyces cerevisiae*. *Yeast* **13**, 1065-1075, doi:10.1002/(SICI)1097-0061(19970915)13:11<1065::AID-YEA159>3.0.CO;2-K (1997).
- Oceguera-Yanez, F. *et al.* Engineering the AAVS1 locus for consistent and scalable transgene expression in human iPSCs and their differentiated derivatives. *Methods* **101**, 43-55, doi:10.1016/j.ymeth.2015.12.012 (2016).
- Pridmore, R. D. New and versatile cloning vectors with kanamycin-resistance marker. *Gene* **56**, 309-312, doi:10.1016/0378-1119(87)90149-1 (1987).
- Ran, F. A. *et al.* Genome engineering using the CRISPR-Cas9 system. *Nature Protocols* **8**, 2281-2308, doi:10.1038/nprot.2013.143 (2013).
- Benitez-Guijarro, M. *et al.* RNase H2, mutated in Aicardi-Goutières syndrome, promotes LINE-1 retrotransposition. *The EMBO journal* **37**, doi:10.15252/embj.201798506 (2018).
- Zimmermann, M. *et al.* CRISPR screens identify genomic ribonucleotides as a source of PARP-trapping lesions. *Nature* **559**, 285-289, doi:10.1038/s41586-018-0291-z (2018).
- Drost, J. *et al.* Use of CRISPR-modified human stem cell organoids to study the origin of mutational signatures in cancer. *Science* **358**, 234-238, doi:10.1126/science.aao3130 (2017).
- Consortium, T. I. T. P.-C. A. o. W. G. Pan-cancer analysis of whole genomes. *Nature* **578**, 82-93, doi:10.1038/s41586-020-1969-6 (2020).
- Conover, H. N. *et al.* Stimulation of Chromosomal Rearrangements by Ribonucleotides. *Genetics* **201**, 951-961, doi:10.1534/genetics.115.181149 (2015).
- Lujan, S. A. *et al.* Heterogeneous polymerase fidelity and mismatch repair bias genome variation and composition. *Genome research* **24**, 1751-1764, doi:10.1101/gr.178335.114 (2014).
- Consortium, T. G. E. R. The 100,000 Genomes Project | Genomics England. (2020).
- Puente, X. S. *et al.* Non-coding recurrent mutations in chronic lymphocytic leukaemia. *Nature* **526**, 519-524, doi:10.1038/nature14666 (2015).
- Alexandrov, L. B. *et al.* The repertoire of mutational signatures in human cancer. *Nature* **578**, 94-101, doi:10.1038/s41586-020-1943-3 (2020).
- Zhao, G. *et al.* Gene4Denovo: an integrated database and analytic platform for de novo mutations in humans. *Nucleic acids research* **48**, D913--D926 (2020).

- 16 Xia, B. *et al.* Widespread Transcriptional Scanning in the Testis Modulates Gene Evolution Rates. *Cell* **180**, 248-262 e221, doi:10.1016/j.cell.2019.12.015 (2020).
- 17 Baranello, L. *et al.* RNA Polymerase II Regulates Topoisomerase 1 Activity to Favor Efficient Transcription. *Cell* **165**, 357-371, doi:10.1016/j.cell.2016.02.036 (2016).
- 18 Reijns, M. A. M. *et al.* Lagging-strand replication shapes the mutational landscape of the genome. *Nature* **518**, 502-506, doi:10.1038/nature14183 (2015).
- 19 Keane, T. M. *et al.* Mouse genomic variation and its effect on phenotypes and gene regulation. *Nature* **477**, 289-294, doi:10.1038/nature10413 (2011).
- 20 Sherry, S. T. *et al.* dbSNP: the NCBI database of genetic variation. *Nucleic Acids Res* **29**, 308-311, doi:10.1093/nar/29.1.308 (2001).
- 21 Lappalainen, I. *et al.* DbVar and DGVa: public archives for genomic structural variation. *Nucleic Acids Res* **41**, D936-941, doi:10.1093/nar/gks1213 (2013).
- 22 Aken, B. L. *et al.* Ensembl 2017. *Nucleic Acids Res* **45**, D635-D642, doi:10.1093/nar/gkw1104 (2017).
- 23 Flicek, P. *et al.* Ensembl 2014. *Nucleic Acids Res* **42**, D749-755, doi:10.1093/nar/gkt1196 (2014).
- 24 Frankish, A. *et al.* GENCODE reference annotation for the human and mouse genomes. *Nucleic Acids Res* **47**, D766-D773, doi:10.1093/nar/gky955 (2019).
- 25 Karimzadeh, M., Ernst, C., Kundaje, A. & Hoffman, M. M. Umap and Bimap: quantifying genome and methylome mappability. *Nucleic Acids Res* **46**, e120, doi:10.1093/nar/gky677 (2018).
